# Supplementary material for: The gut bacterial diversity of sheep associated with different breeds in Qinghai province
Source: PubMed Central journal article supplement (PMC7376942; doi:10.1186/s12917-020-02477-2), 2020-07-23
Supplement: 12917_2020_2477_MOESM1_ESM.pdf [file 12917_2020_2477_MOESM1_ESM.pdf]

**Table S1:** The information of sheep in this study.

| No. | Breeds                     | Antibiotic treatment | Region                  | Health condition |
|-----|----------------------------|----------------------|-------------------------|------------------|
| 1   | Dorset sheep(DsS)          | none                 | Qinghai Province, China | healthy          |
| 2   | Dorset sheep(DsS)          | none                 | Qinghai Province, China | healthy          |
| 3   | Dorset sheep(DsS)          | none                 | Qinghai Province, China | healthy          |
| 4   | Dorset sheep(DsS)          | none                 | Qinghai Province, China | healthy          |
| 5   | Dorset sheep(DsS)          | none                 | Qinghai Province, China | healthy          |
| 6   | Dorset sheep(DsS)          | none                 | Qinghai Province, China | healthy          |
| 7   | Dorset sheep(DsS)          | none                 | Qinghai Province, China | healthy          |
| 8   | Dorset sheep(DsS)          | none                 | Qinghai Province, China | healthy          |
| 9   | Dorset sheep(DsS)          | none                 | Qinghai Province, China | healthy          |
| 10  | Dorset sheep(DsS)          | none                 | Qinghai Province, China | healthy          |
| 11  | Small Tail Han sheep(STHS) | none                 | Qinghai Province, China | healthy          |
| 12  | Small Tail Han sheep(STHS) | none                 | Qinghai Province, China | healthy          |
| 13  | Small Tail Han sheep(STHS) | none                 | Qinghai Province, China | healthy          |
| 14  | Small Tail Han sheep(STHS) | none                 | Qinghai Province, China | healthy          |
| 15  | Small Tail Han sheep(STHS) | none                 | Qinghai Province, China | healthy          |
| 16  | Small Tail Han sheep(STHS) | none                 | Qinghai Province, China | healthy          |
| 17  | Small Tail Han sheep(STHS) | none                 | Qinghai Province, China | healthy          |
| 18  | Small Tail Han sheep(STHS) | none                 | Qinghai Province, China | healthy          |
| 19  | Small Tail Han sheep(STHS) | none                 | Qinghai Province, China | healthy          |
| 20  | Small Tail Han sheep(STHS) | none                 | Qinghai Province, China | healthy          |
| 21  | Small Tail Han sheep(STHS) | none                 | Qinghai Province, China | healthy          |
| 22  | Small Tail Han sheep(STHS) | none                 | Qinghai Province, China | healthy          |
| 23  | Small Tail Han sheep(STHS) | none                 | Qinghai Province, China | healthy          |
| 24  | Small Tail Han sheep(STHS) | none                 | Qinghai Province, China | healthy          |
| 25  | Small Tail Han sheep(STHS) | none                 | Qinghai Province, China | healthy          |
| 26  | Tibetan sheep(TS)          | none                 | Qinghai Province, China | healthy          |
| 27  | Tibetan sheep(TS)          | none                 | Qinghai Province, China | healthy          |
| 28  | Tibetan sheep(TS)          | none                 | Qinghai Province, China | healthy          |
| 29  | Tibetan sheep(TS)          | none                 | Qinghai Province, China | healthy          |
| 30  | Tibetan sheep(TS)          | none                 | Qinghai Province, China | healthy          |
| 31  | Dorper sheep(DrS)          | none                 | Qinghai Province, China | healthy          |
| 32  | Dorper sheep(DrS)          | none                 | Qinghai Province, China | healthy          |
| 33  | Dorper sheep(DrS)          | none                 | Qinghai Province, China | healthy          |
| 34  | Dorper sheep(DrS)          | none                 | Qinghai Province, China | healthy          |
| 35  | Dorper sheep(DrS)          | none                 | Qinghai Province, China | healthy          |
| 36  | Dorper sheep(DrS)          | none                 | Qinghai Province, China | healthy          |
| 37  | Dorper sheep(DrS)          | none                 | Qinghai Province, China | healthy          |
| 38  | Dorper sheep(DrS)          | none                 | Qinghai Province, China | healthy          |
| 39  | Dorper sheep(DrS)          | none                 | Qinghai Province, China | healthy          |
| 40  | Dorper sheep(DrS)          | none                 | Qinghai Province, China | healthy          |

**Table S2:** Sequence data of samples.

| Group | Raw sequences | High quality<br>valid sequences | OTUs | Average valid<br>sequences of sample |
|-------|---------------|---------------------------------|------|--------------------------------------|
| DrS   | 444002        | 355132                          | 7039 | 35514                                |
| DsS   | 641786        | 507753                          | 6887 | 33851                                |
| TS    | 203332        | 167035                          | 4112 | 33407                                |
| STHS  | 405144        | 329485                          | 8257 | 32949                                |

**Table S3:** The estimators of sequence diversity and richness.

| Sample<br>ID | 0.97    |         |         |         |
|--------------|---------|---------|---------|---------|
|              | Simpson | Chao1   | ACE     | Shannon |
| DsS1         | 0.996   | 2723.14 | 2937.31 | 9.55    |
| DsS2         | 0.997   | 3103.62 | 3327.68 | 9.9     |
| DsS3         | 0.997   | 3439.89 | 3488.37 | 9.98    |
| DsS4         | 0.997   | 2832.73 | 2905.67 | 9.71    |
| DsS5         | 0.997   | 2385.47 | 2429.78 | 9.88    |
| DsS6         | 0.998   | 3486.62 | 3701.14 | 10.19   |
| DsS7         | 0.996   | 2691.09 | 2827.07 | 9.49    |
| DsS8         | 0.998   | 3813.87 | 3798.53 | 10.25   |
| DsS9         | 0.998   | 3631    | 3776.38 | 10.19   |
| DsS10        | 0.997   | 3491.47 | 3434.29 | 10.09   |
| STHS1        | 0.998   | 3629.71 | 3849.4  | 10.4    |
| STHS2        | 0.998   | 3640.8  | 3639.86 | 10.4    |
| STHS3        | 0.998   | 3488.14 | 3687.34 | 10.17   |
| STHS4        | 0.998   | 3320.24 | 3442.62 | 10.21   |
| STHS5        | 0.998   | 3621.41 | 3607.46 | 10.36   |
| STHS6        | 0.998   | 2446.48 | 2459.22 | 10.2    |
| STHS7        | 0.998   | 3567.37 | 3575.85 | 10.44   |
| STHS8        | 0.997   | 2720.1  | 2858.37 | 9.99    |
| STHS9        | 0.998   | 3521.68 | 3520.49 | 10.23   |
| STHS10       | 0.997   | 3640.33 | 3765.47 | 10.11   |
| STHS11       | 0.971   | 733.57  | 712.97  | 6.9     |
| STHS12       | 0.975   | 1159.52 | 1106.44 | 7.44    |
| STHS13       | 0.991   | 1620.74 | 1601.05 | 8.38    |
| STHS14       | 0.984   | 1173    | 1173    | 7.96    |
| STHS15       | 0.973   | 690.92  | 691.66  | 6.81    |
| TS1          | 0.958   | 1138.99 | 1169.45 | 7.14    |
| TS2          | 0.995   | 2407.35 | 2506.83 | 9.32    |
| TS3          | 0.992   | 1649    | 1649.72 | 8.9     |
| TS4          | 0.978   | 1574.28 | 1681.46 | 7.57    |
| TS5          | 0.983   | 1156.66 | 1125.47 | 7.5     |
| DrS1         | 0.989   | 1680.66 | 1748.88 | 8.34    |
| DrS2         | 0.986   | 1007.79 | 1019.94 | 7.56    |

|       |         |         |          |       |
|-------|---------|---------|----------|-------|
| DrS3  | 0.983   | 1895.23 | 1914.18  | 8.45  |
| DrS4  | 0.984   | 959.14  | 971.54   | 7.42  |
| DrS5  | 0.994   | 2840.34 | 3021.31  | 9.43  |
| DrS6  | 0.993   | 2206    | 2206     | 9.54  |
| DrS7  | 0.997   | 3350.73 | 3344.35  | 9.97  |
| DrS8  | 0.997   | 2853.69 | 3018.84  | 10.09 |
| DrS9  | 0.998   | 2366.15 | 2372.82  | 10.02 |
| DrS10 | 0.996   | 2907.86 | 3048.11  | 9.75  |
| Mean  | 0.991   | 2514.17 | 2577.91  | 9.26  |
| ±SD   | ±0.0095 | ±990.66 | ±1027.96 | ±1.16 |
